# Supplementary material for: Glucosinolates in Wild-Growing Reseda spp. from Croatia
Source: MDPI journal article supplement (doi:10.3390/molecules28041753), 2023-02-12
Supplement: s1 [file s1]

## Supplementary Materials

**Glucosinolates in Wild-Growing *Reseda* spp. from Croatia**Azra Đulović <sup>1</sup>, Josip Tomaš <sup>2</sup> and Ivica Blažević <sup>1,\*</sup>

<sup>1</sup> Department of Organic Chemistry, Faculty of Chemistry and Technology, University of Split,  
Ruđera Boškovića 35, 21000 Split, Croatia

<sup>2</sup> Institute de Chimie Organique et Analytique (ICOA), Université d'Orléans, UMR-CNRS 7311, BP 6759,  
F-45067 Orléans, France

\* Correspondence: blazevic@ktf-split.hr; Tel.: +385-21-329-434

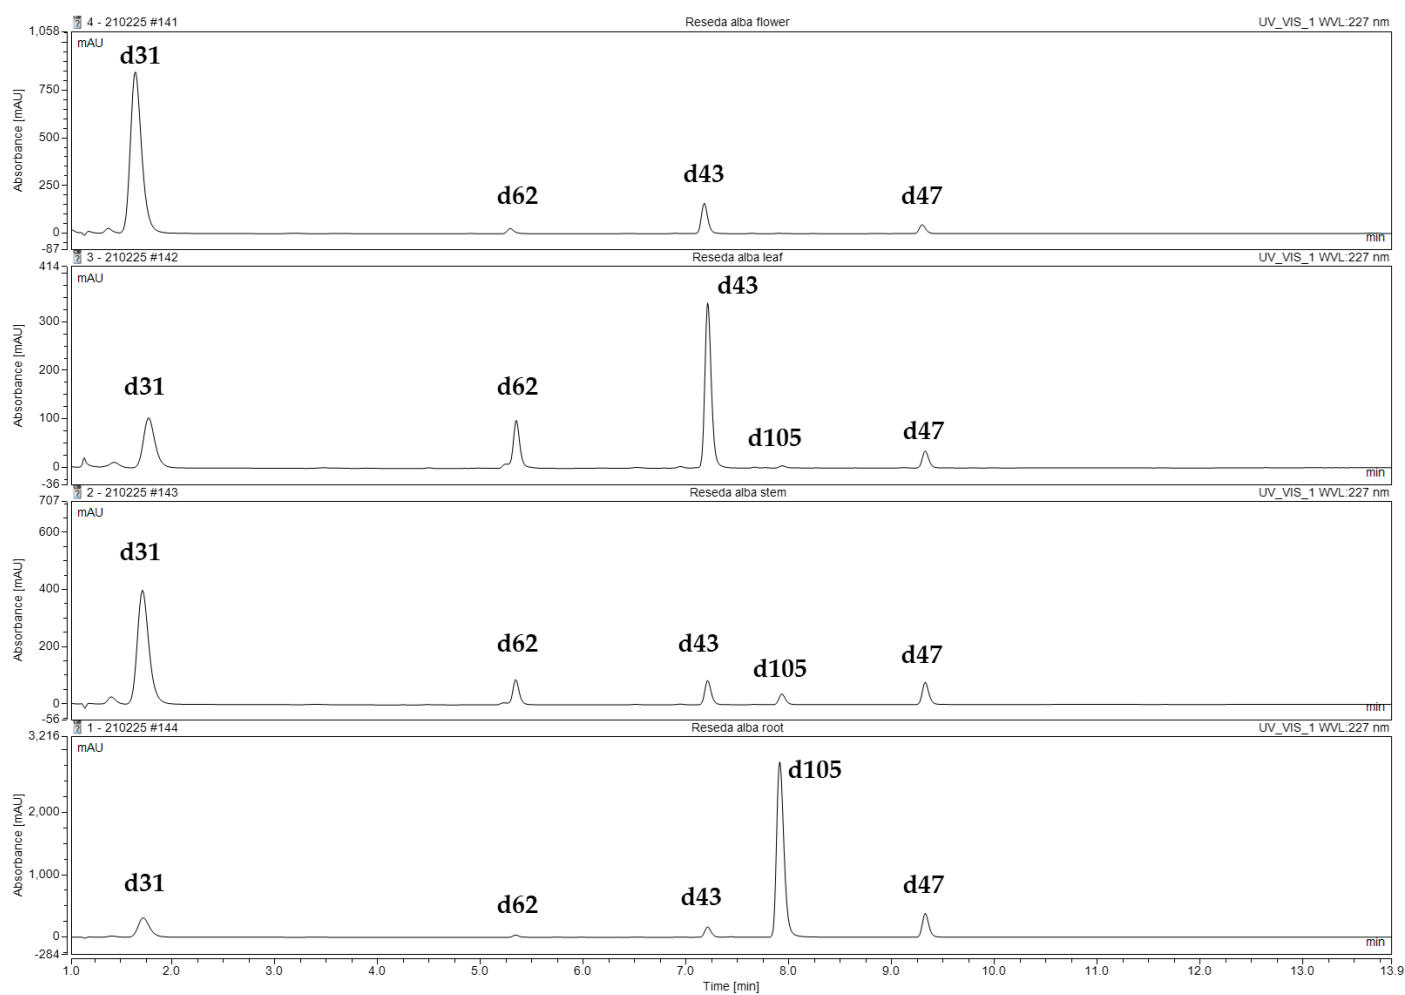

**Figure S1.** Chromatogram of desulfoglucosinolates obtained from the different plant parts of *Reseda alba* (flower, leaf, stem, root):

**d31** – desulfo-2-hydroxy-2-methylpropyl GSL (desulfoglucosinigrin), **d43** – desulfoindol-3-ylmethyl GSL (desulfoglucobrassicin), **d47** – desulfo-*N*-methoxyindol-3-ylmethyl GSL (desulfoneoglucobrassicin), **d62** – desulfoisobutyl GSL, **d105** – desulfo-2-phenylethyl GSL, (desulfoglucosinasturtiin)

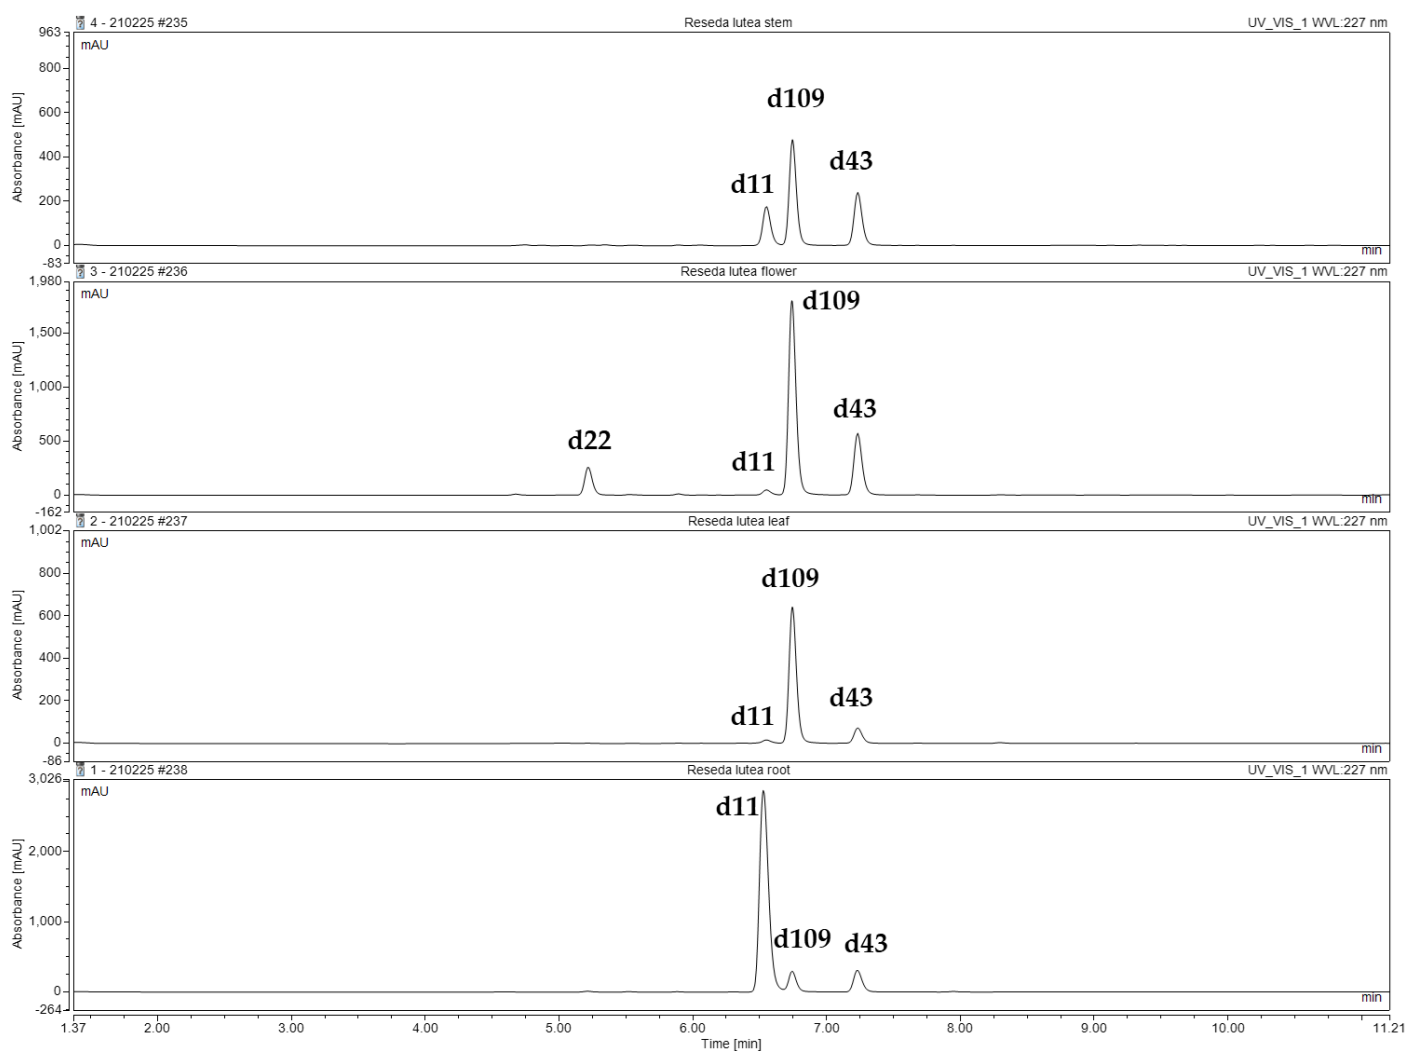

**Figure S2.** Chromatogram of desulfoglucosinolates obtained from the different plant parts of *Reseda lutea* (stem, flower, leaf, root):

**d11** - desulfobenzyl GSL (desulfoglucotropaeolin), **d22** – desulfo-3-hydroxybenzyl GSL (desulfoglucocolepigramin), **d43** - desulfoindol-3-ylmethyl GSL (desulfoglucobrassicin), **d109** – desulfo-2-( $\alpha$ -L-rhamnopyranosyloxy)benzyl GSL.

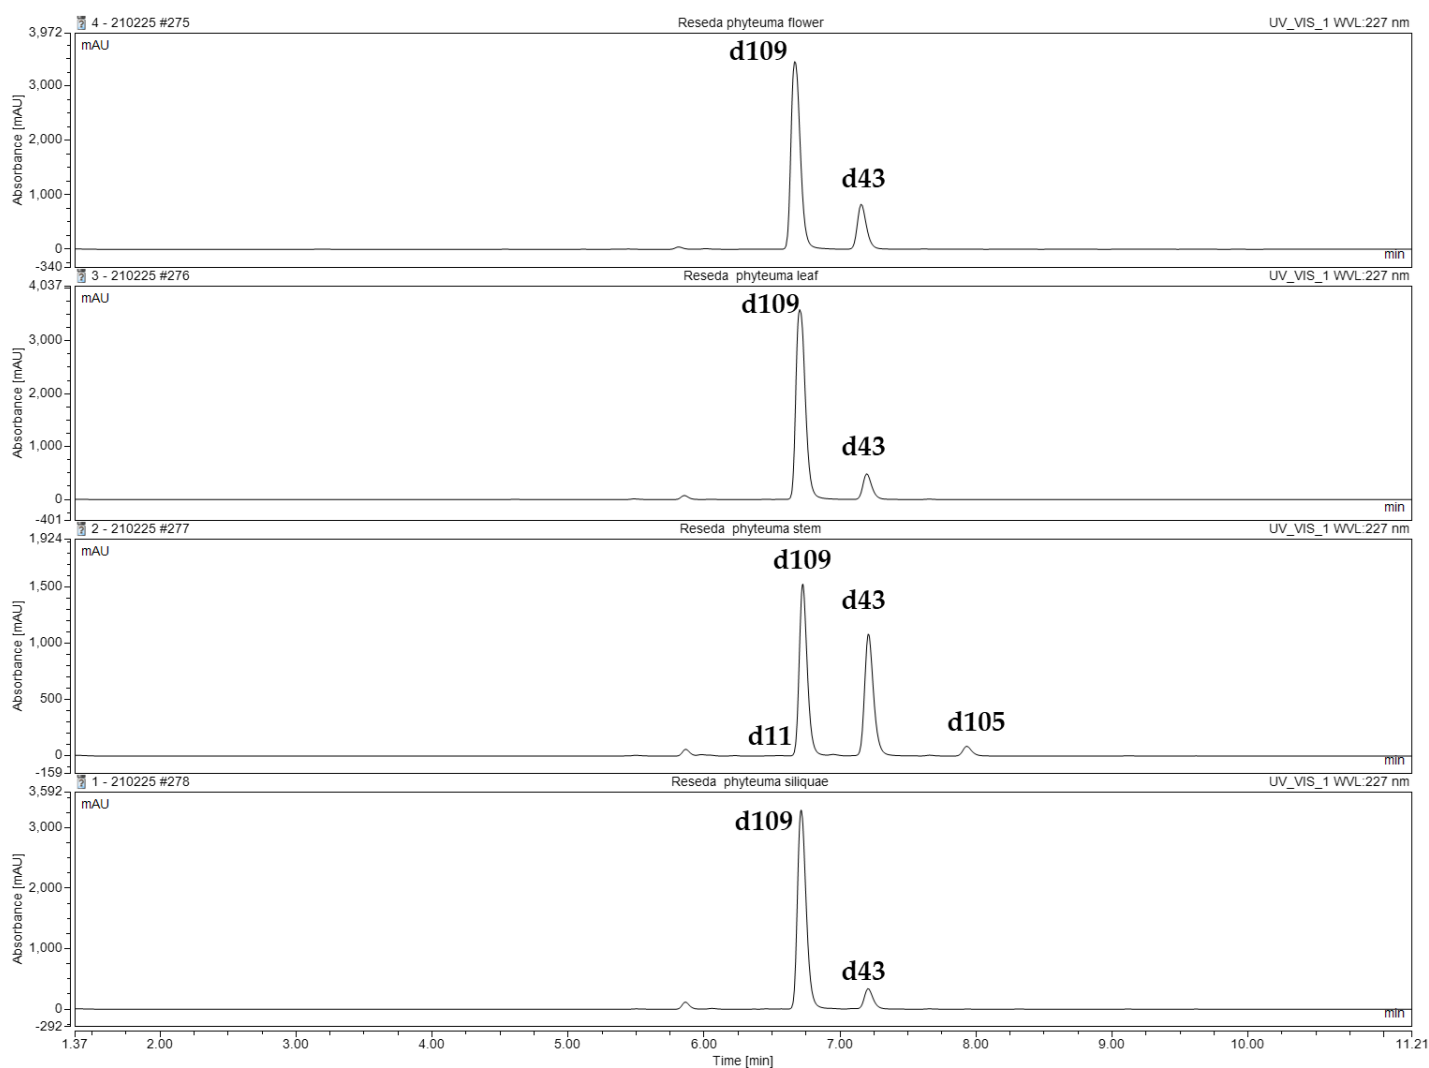

**Figure S3.** Chromatogram of desulfoglucosinolates obtained from the different plant parts of *Reseda phyteuma* (flower, leaf, stem, siliquae): **d11** - desulfobenzyl GSL (desulfoglucotropaeolin), **d43** - desulfoindol-3-ylmethyl GSL (desulfoglucobrassicin), **d105** - desulfo-2-phenylethyl GSL (desulfogluconasturtiin), **d109** - desulfo-2-( $\alpha$ -L-rhamnopyranosyloxy)benzyl GSL.

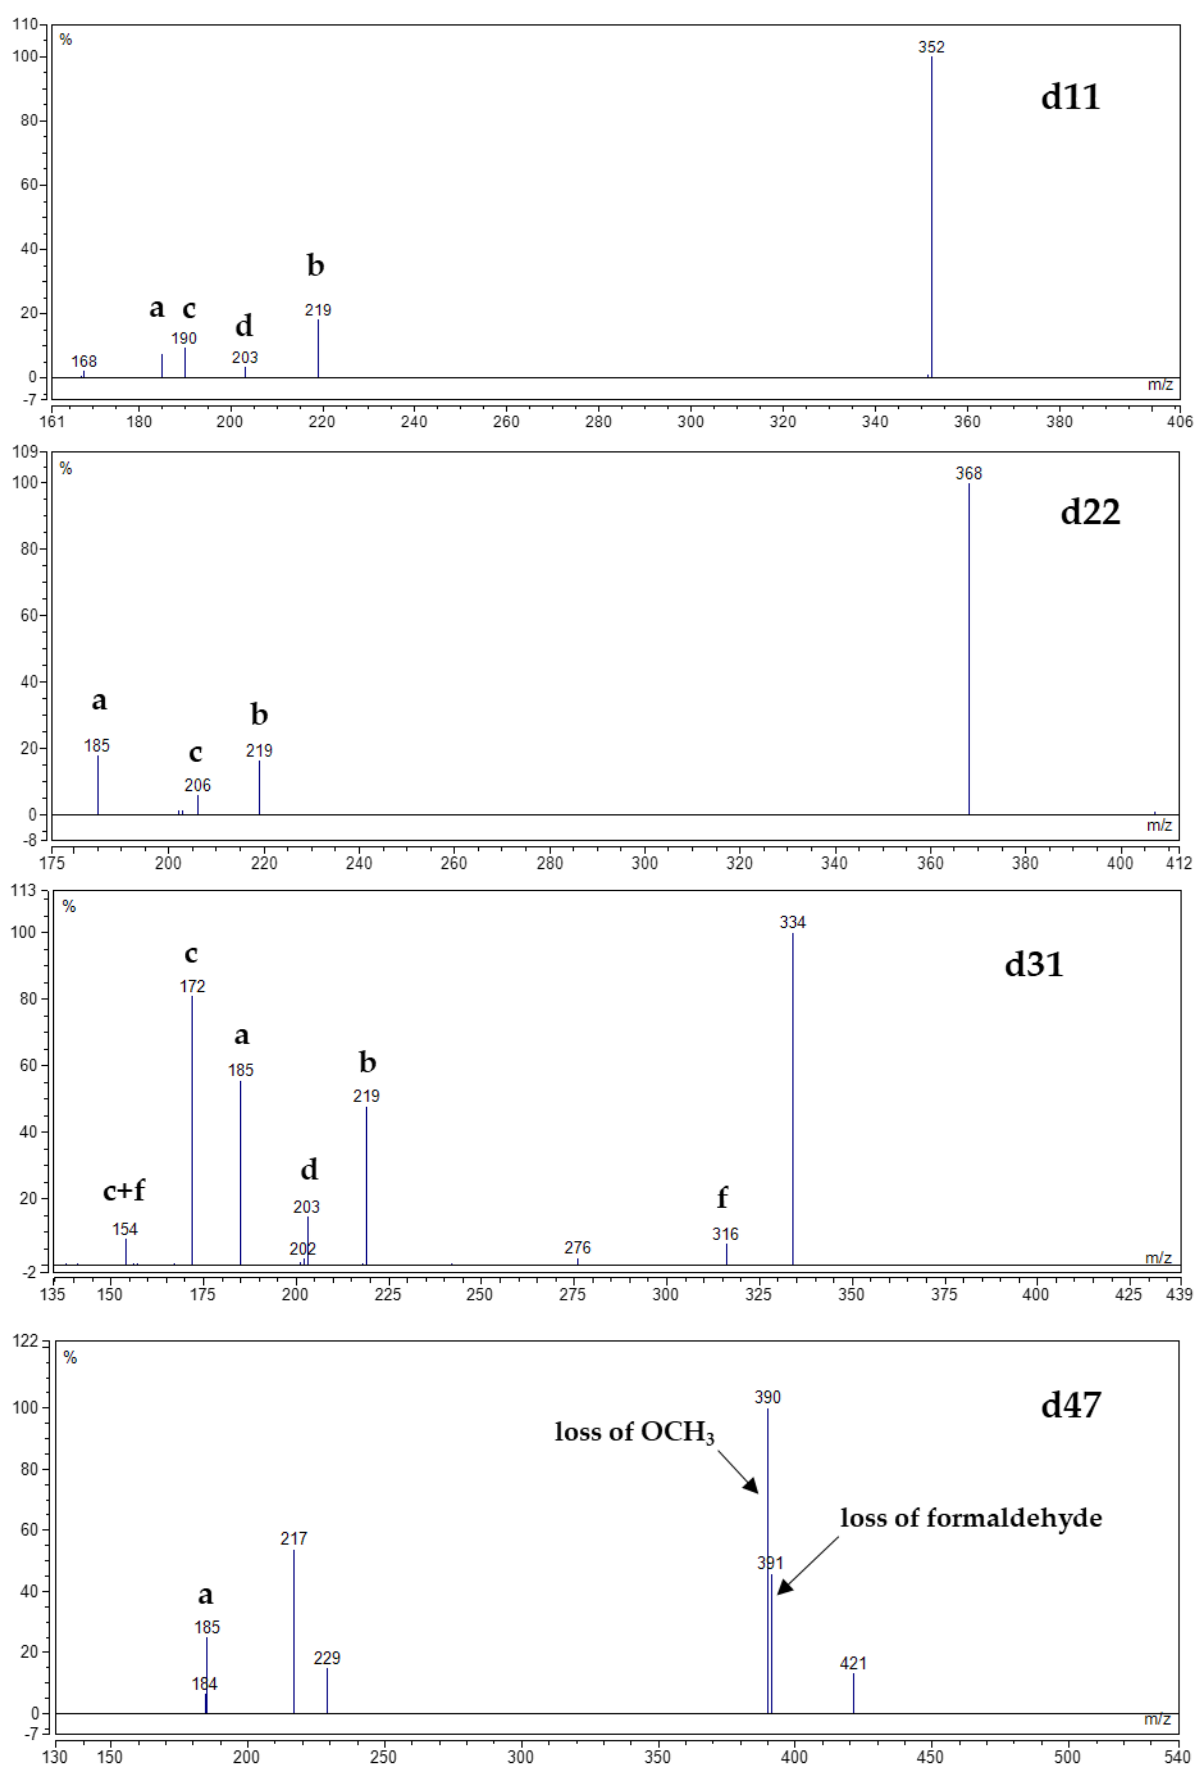

Figure S4A. Continuous

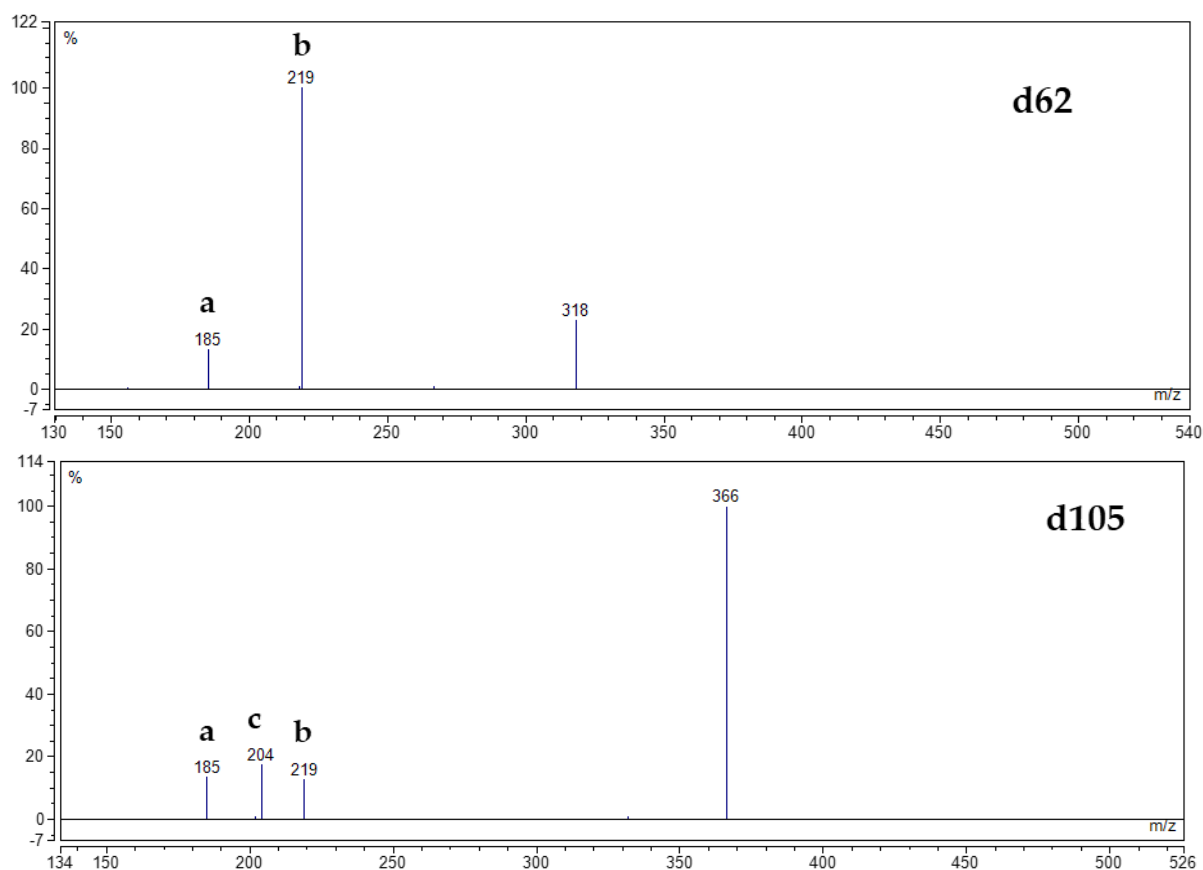

**Figure S4. A.** MS<sup>2</sup> spectra at 15V of detected desulfoglucosinolates. Fragment types observed, alone or in combination, in MS<sup>2</sup> spectra desulfoglucosinolates (dGSLs) in positive mode: **a** - Na<sup>+</sup> adduct of anhydroglucose, C<sub>6</sub>H<sub>10</sub>O<sub>5</sub> (at *m/z* 185) or an acyl derivative; **b** - Na<sup>+</sup> adduct of thioglucose, C<sub>6</sub>H<sub>11</sub>O<sub>5</sub>SH (at *m/z* 219) or an acyl derivative; **c** - Loss of anhydroglucose (*m/z* 162) or an acyl derivative; **d** - Na<sup>+</sup> adduct of glucose, C<sub>6</sub>H<sub>12</sub>O<sub>6</sub> (at *m/z* 203); **e** - Loss of thioglucose (*m/z* 196) or an acyl derivative; **f** - loss of water.

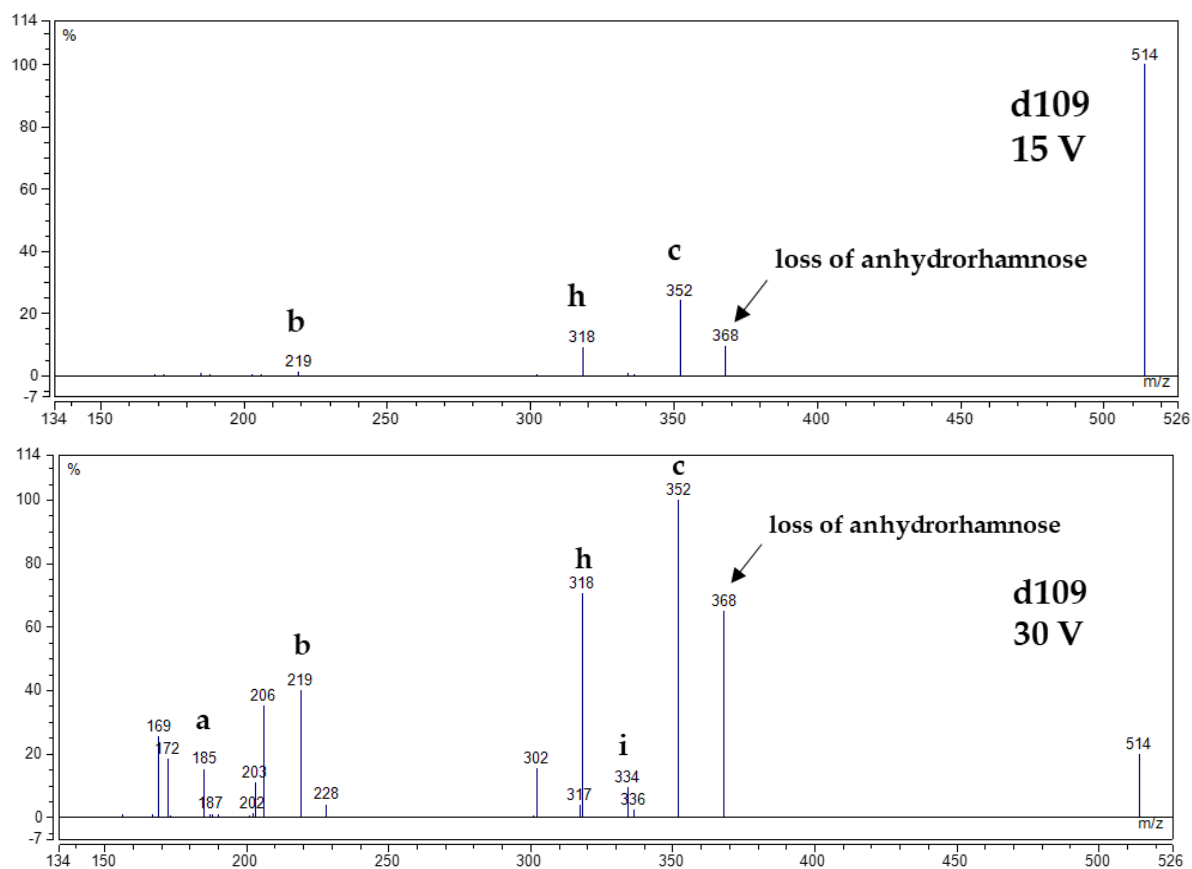

**Figure S4. B.** MS<sup>2</sup> spectra of **d109** at 20V and 30 V. Fragment types observed, alone or in combination, in MS<sup>2</sup> spectra desulfoglucosinolates (dGSLs) in positive mode: **a**, **b**, **c** as indicated in Figure S4A; **h** - loss of thioglucose (m/z 196) or an acyl derivate; **i** - loss of glucose (m/z 180).

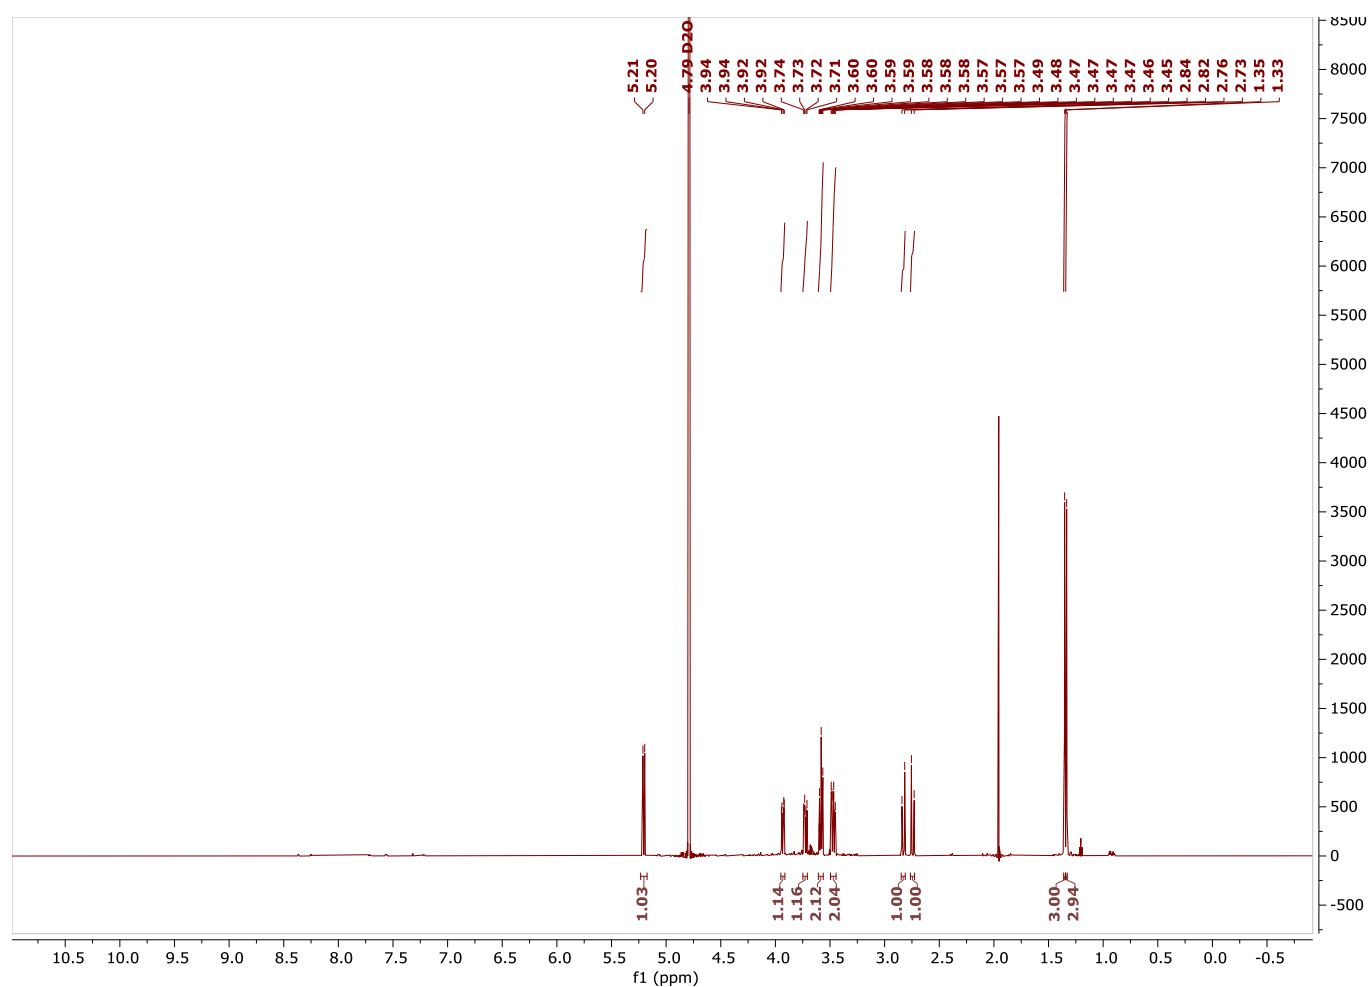

**Figure S5A.**  $^1\text{H}$  NMR spectrum of desulfo-2-hydroxy-2-methylpropyl GSL (desulfoglucosconringiin).



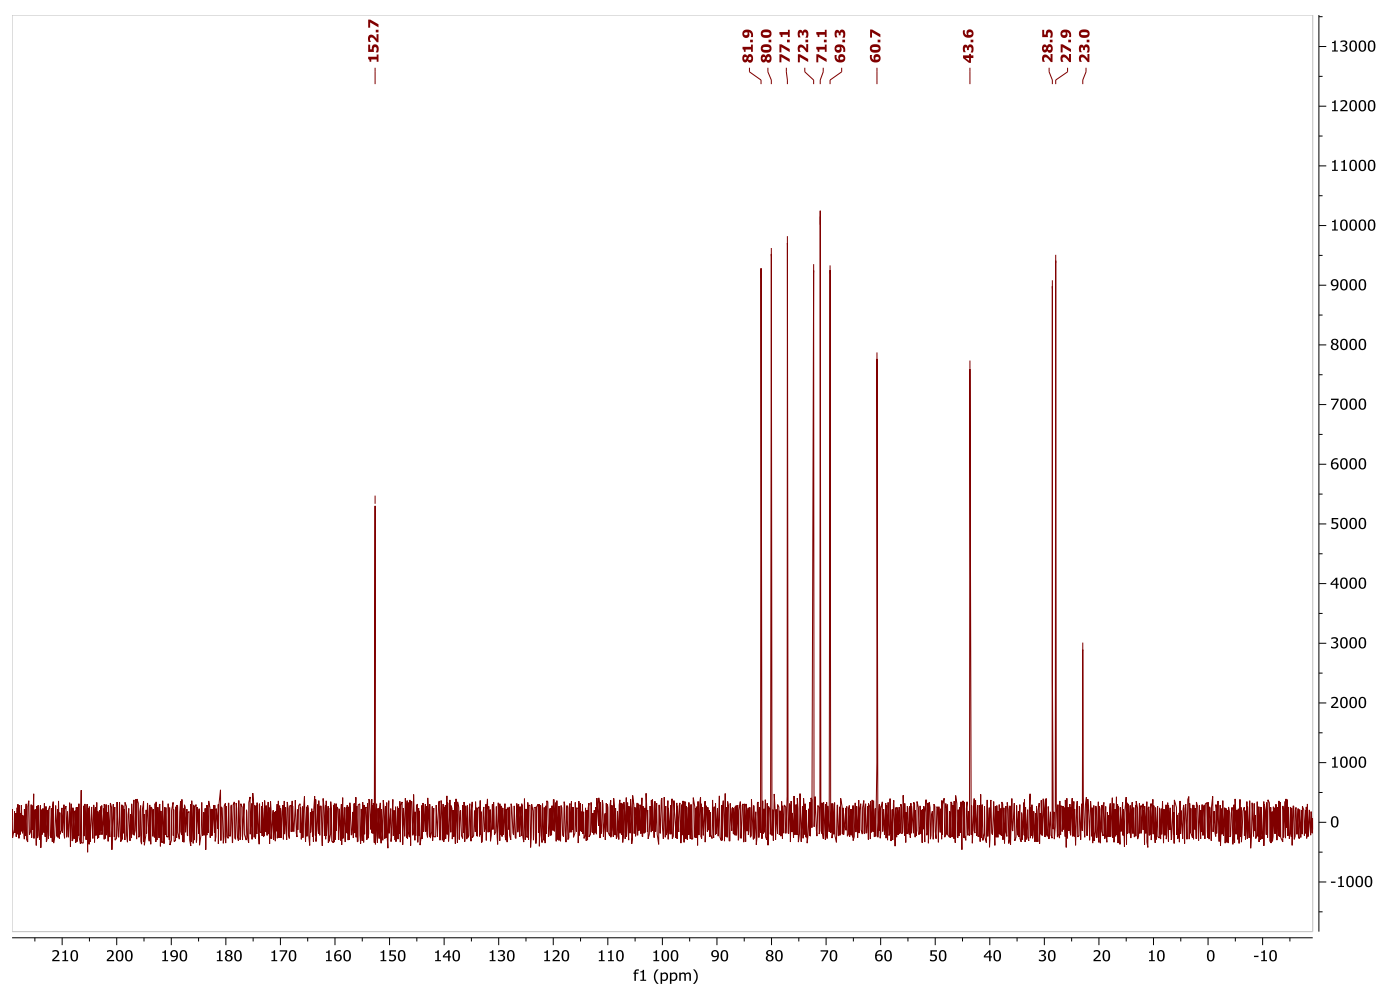

**Figure S5B** .  $^{13}\text{C}$  NMR spectrum of desulfo-2-hydroxy-2-methylpropyl GSL (desulfoglucoconringiin).

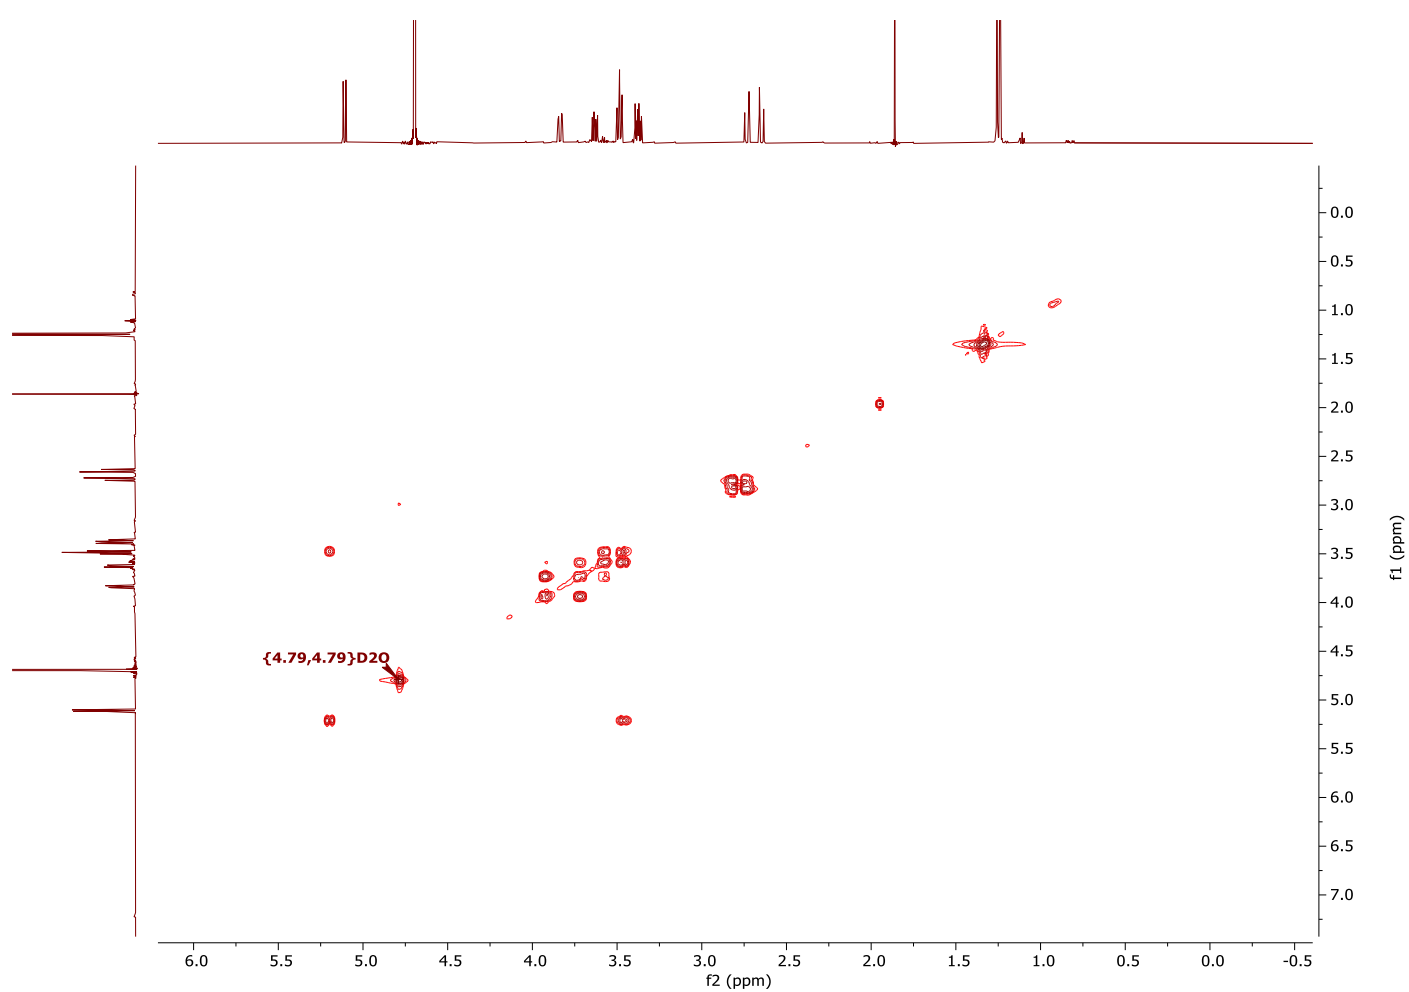

**Figure S5C.** COSY spectrum of desulfo-2-hydroxy-2-methylpropyl GSL (desulfoglucosconringiin).

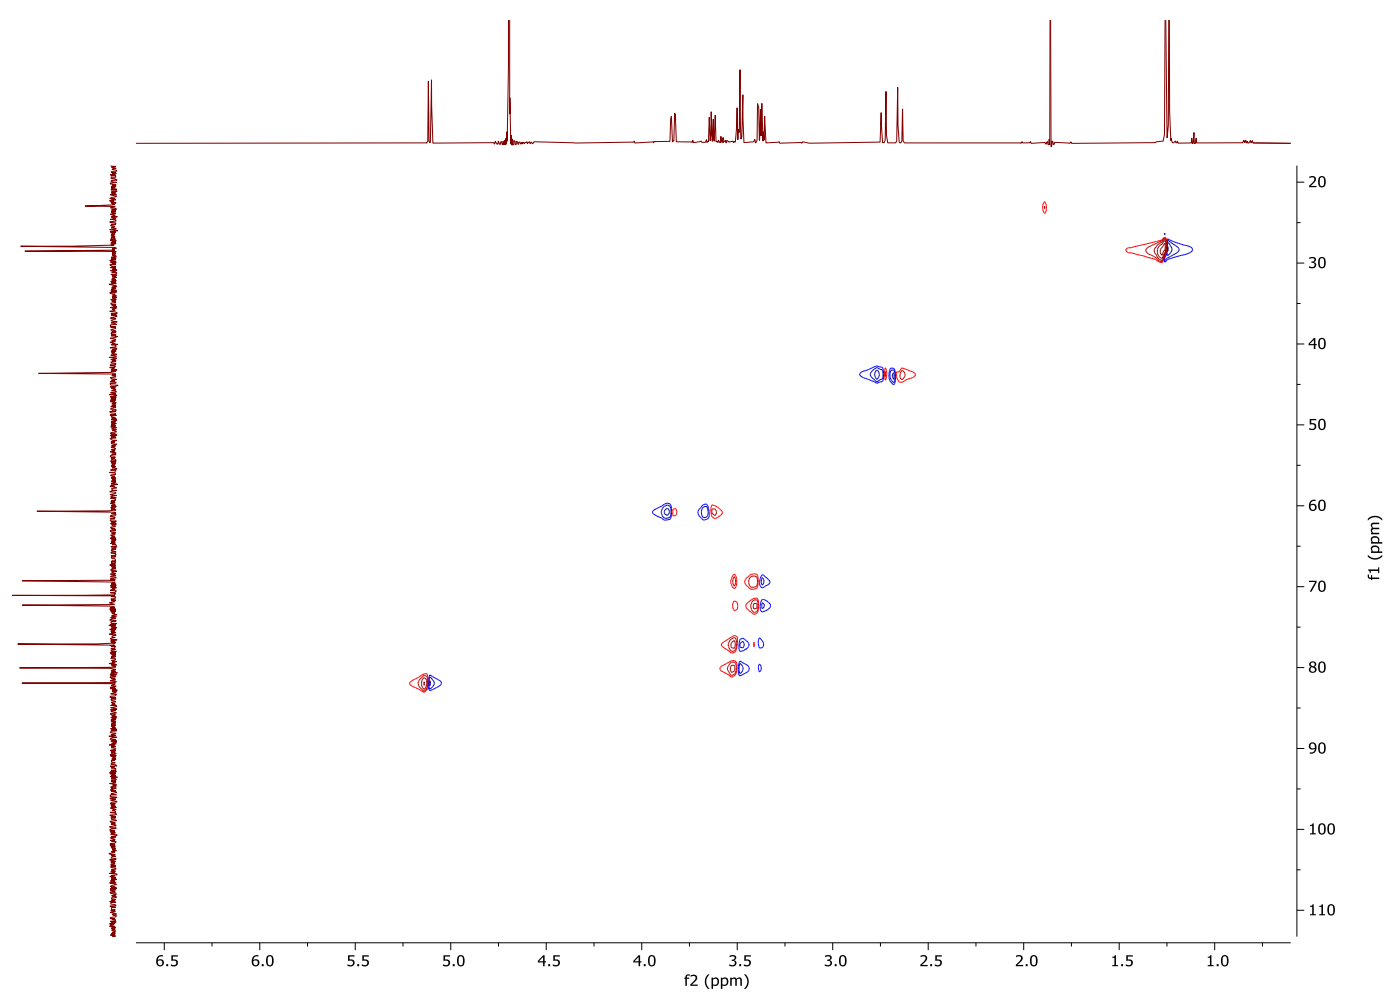

**Figure S5D.** HSQC spectrum of desulfo-2-hydroxy-2-methylpropyl GSL (desulfoglucosconringiin).
